# Supplementary material for: Limits to sustained energy intake XXIV: impact of suckling behaviour on the body temperatures of lactating female mice
Source: PubMed Central journal article supplement (PMC4860708; doi:10.1038/srep25665), 2016-05-09
Supplement: srep25665-s1.pdf [file srep25665-s1.pdf]

**Limits to sustained energy intake XXIV: impact of suckling behaviour on  
the body temperatures of lactating female mice**

**Gamo, Y., Bernard, A., Troup, C. , Munro, F. , Derrer, K., Jeannesson, N.,  
Campbell, A., Gray, H., Miller, J., Dixon, J., Mitchell, S.E., Hambly, C., Vaanholt,  
L.M., and Speakman, J.R.**

**Supplementary Fig. 1**

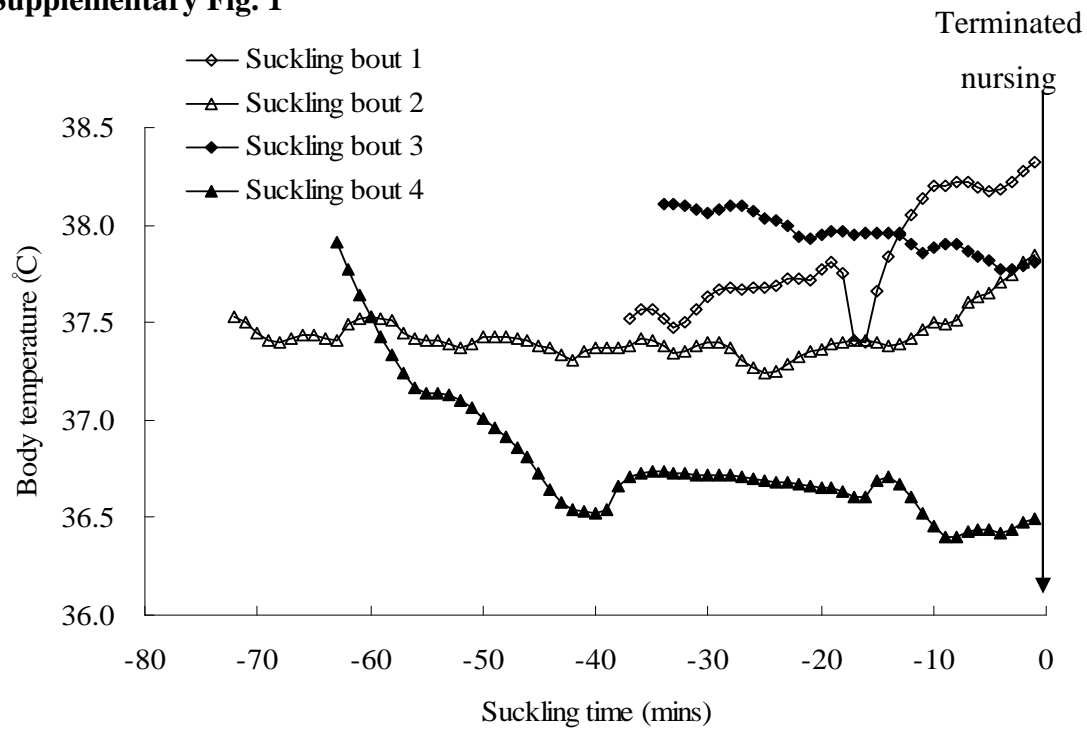

Body temperature development during nursing bouts. The data show changes of body temperatures in four randomly selected nursing bouts. Each symbol represents body temperature in a single bout. Time 0 means termination of nursing.

**Supplementary Table 1. Summary of the number of observed subjects and collected nursing bouts during the 8-hour behavioural observation in lactation.**

| Day of lactation | The number of observed mice | The number of nursing bouts |
|------------------|-----------------------------|-----------------------------|
| 2                | 18                          | 79                          |
| 3                | 18                          | 78                          |
| 4                | 18                          | 85                          |
| 5                | 18                          | 92                          |
| 6                | 18                          | 83                          |
| 7                | 18                          | 81                          |
| 8                | 18                          | 85                          |
| 9                | 18                          | 80                          |
| 10               | 18                          | 91                          |
| 11               | 21                          | 100                         |
| 12               | 23                          | 107                         |
| 13               | 26                          | 119                         |
| 14               | 26                          | 115                         |
| 15               | 25                          | 101                         |
| 16               | 25                          | 105                         |
| 17               | 25                          | 111                         |
| 18               | 25                          | 109                         |
| 19               | 23                          | 116                         |
| 20               | 21                          | 96                          |
